# Supplementary material for: Elucidating Multimodal Imaging Patterns in Accelerated Brain Aging: Heterogeneity through a Discriminant Analysis Approach Using the UK Biobank Dataset
Source: MDPI journal article supplement (doi:10.3390/bioengineering11020124), 2024-01-26

**Figure S1.** Comparative analysis of gray matter volume across the three subgroups and the control group. Statistical significance denoted as \* indicates  $q < 0.01$ , while \*\* signifies  $q < 0.001$ .

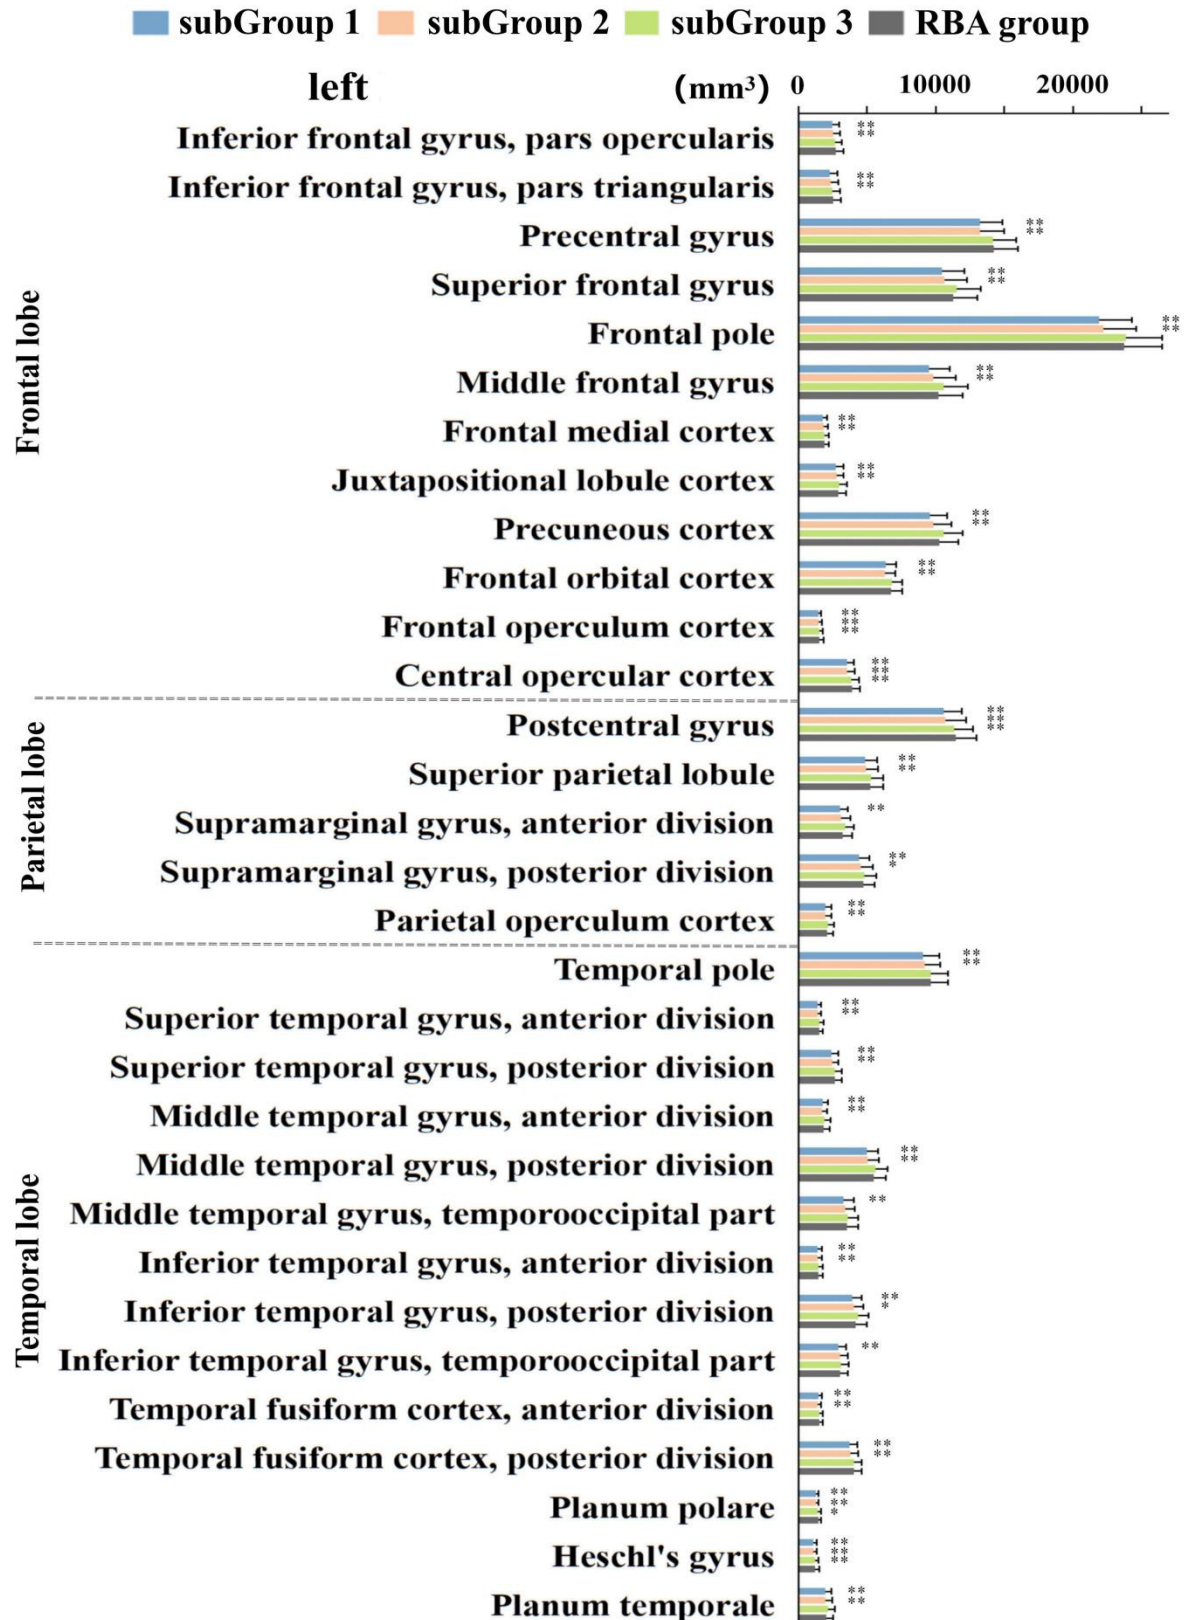

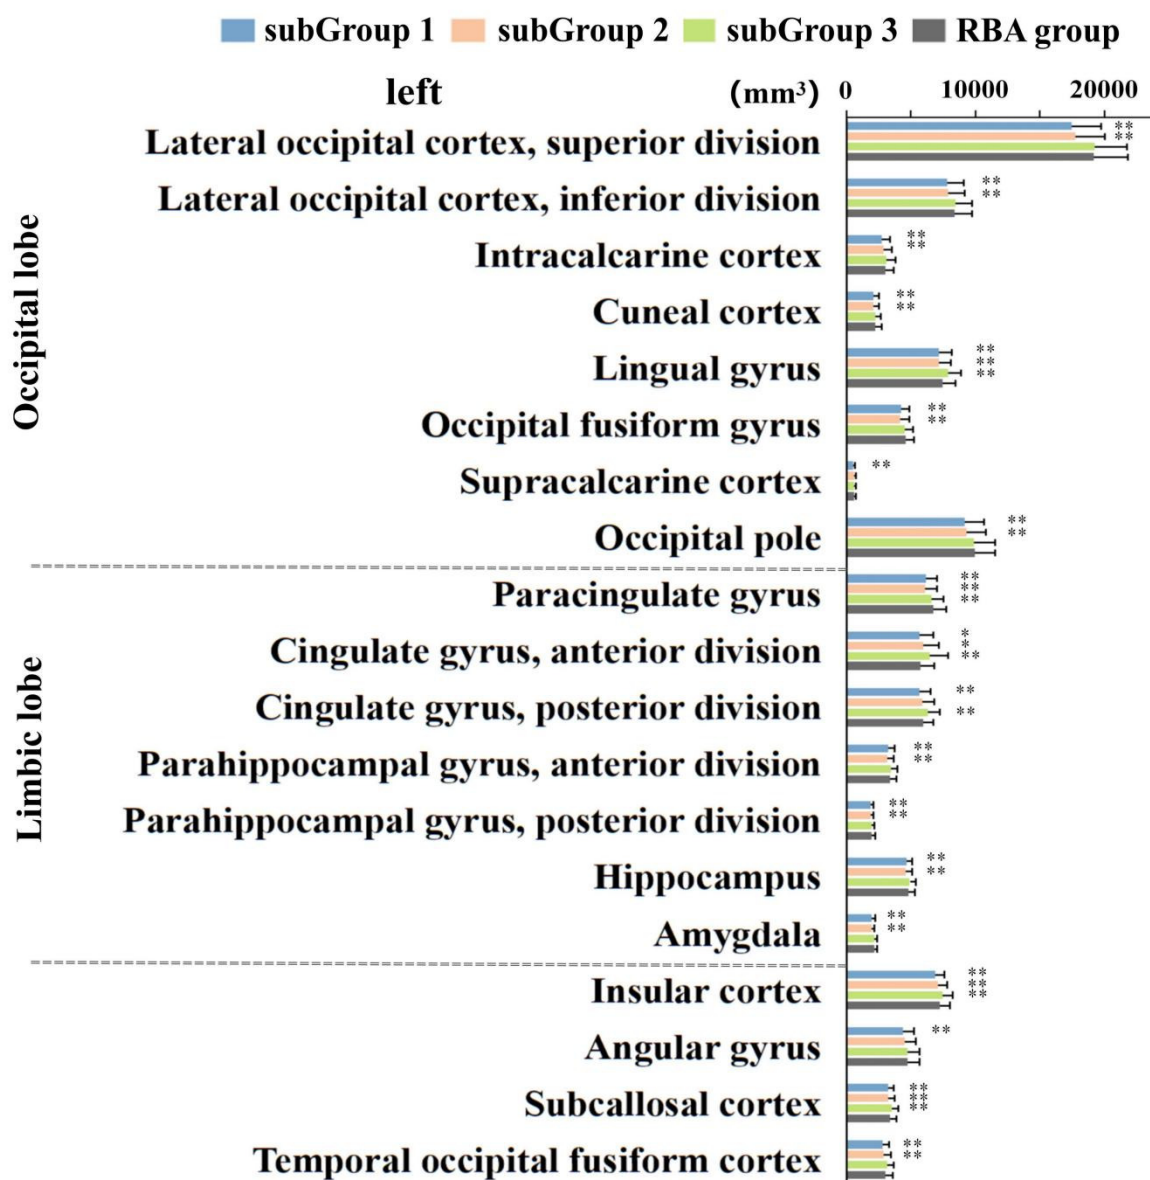

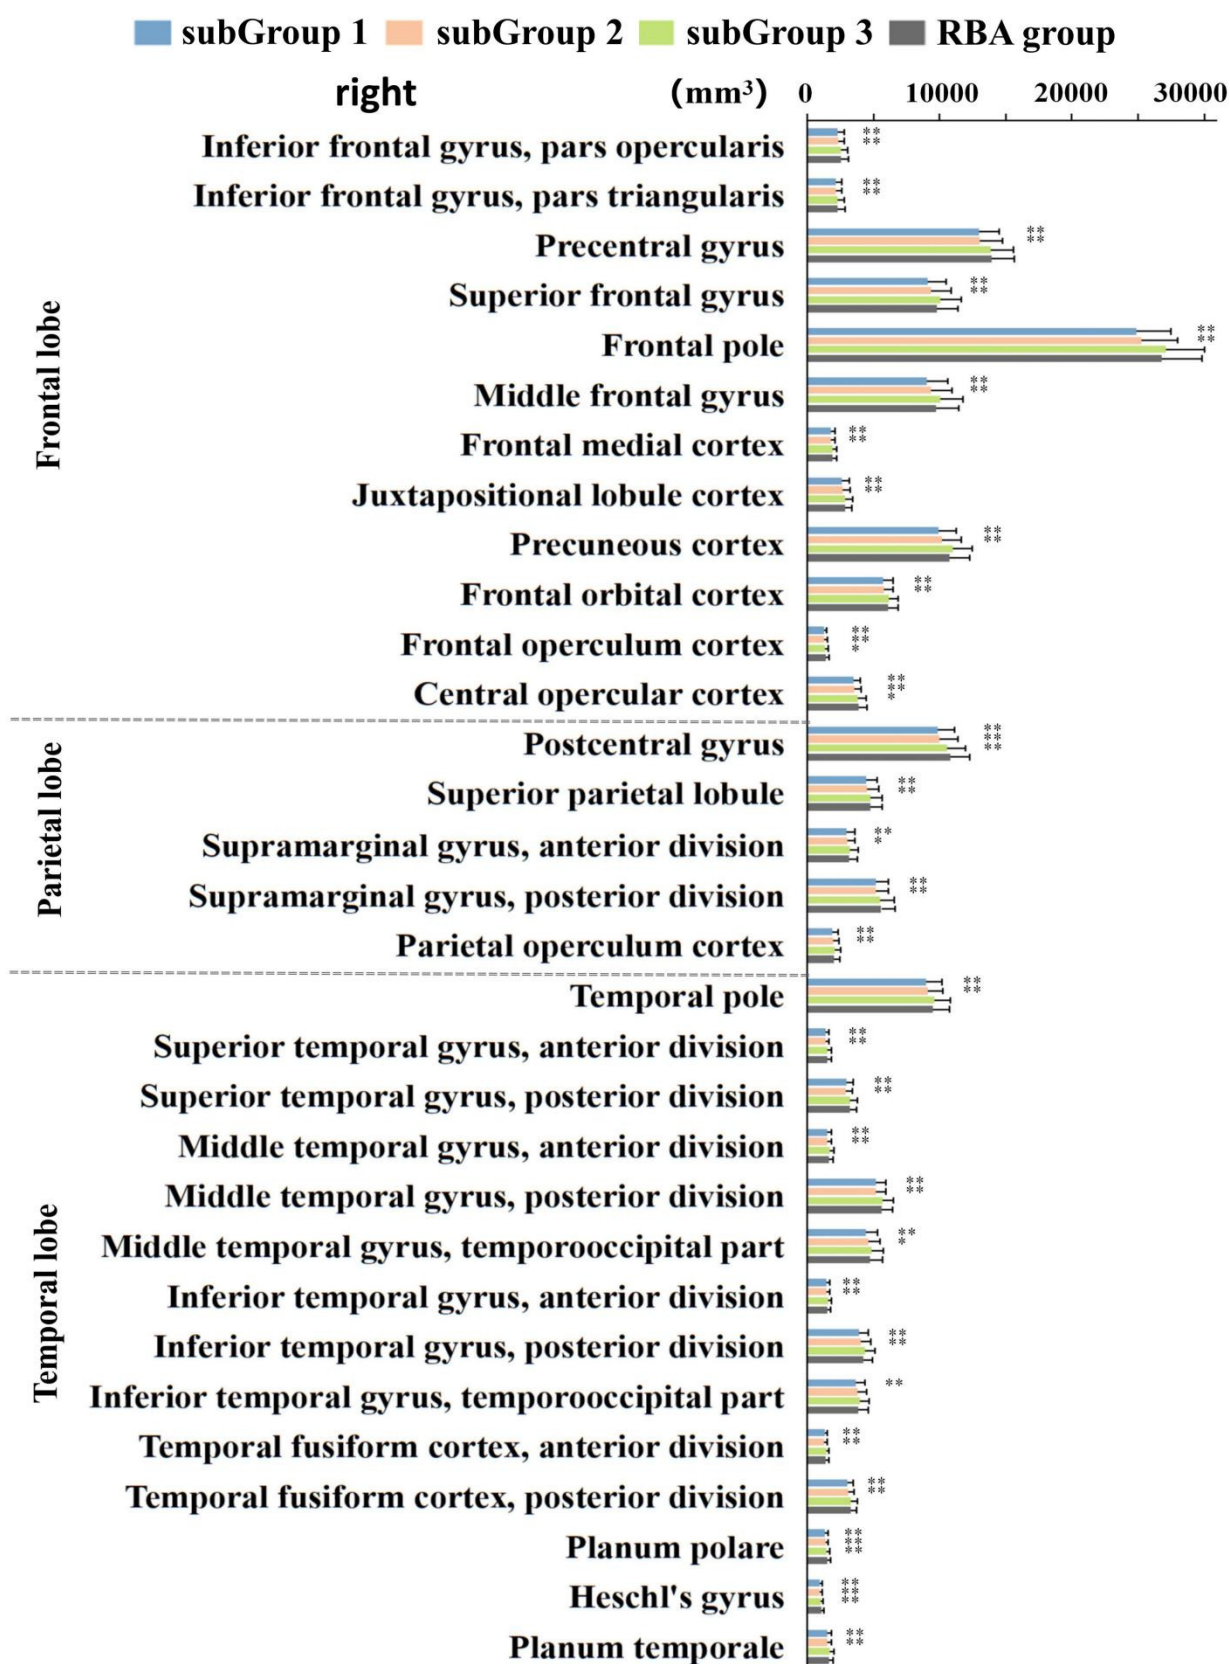

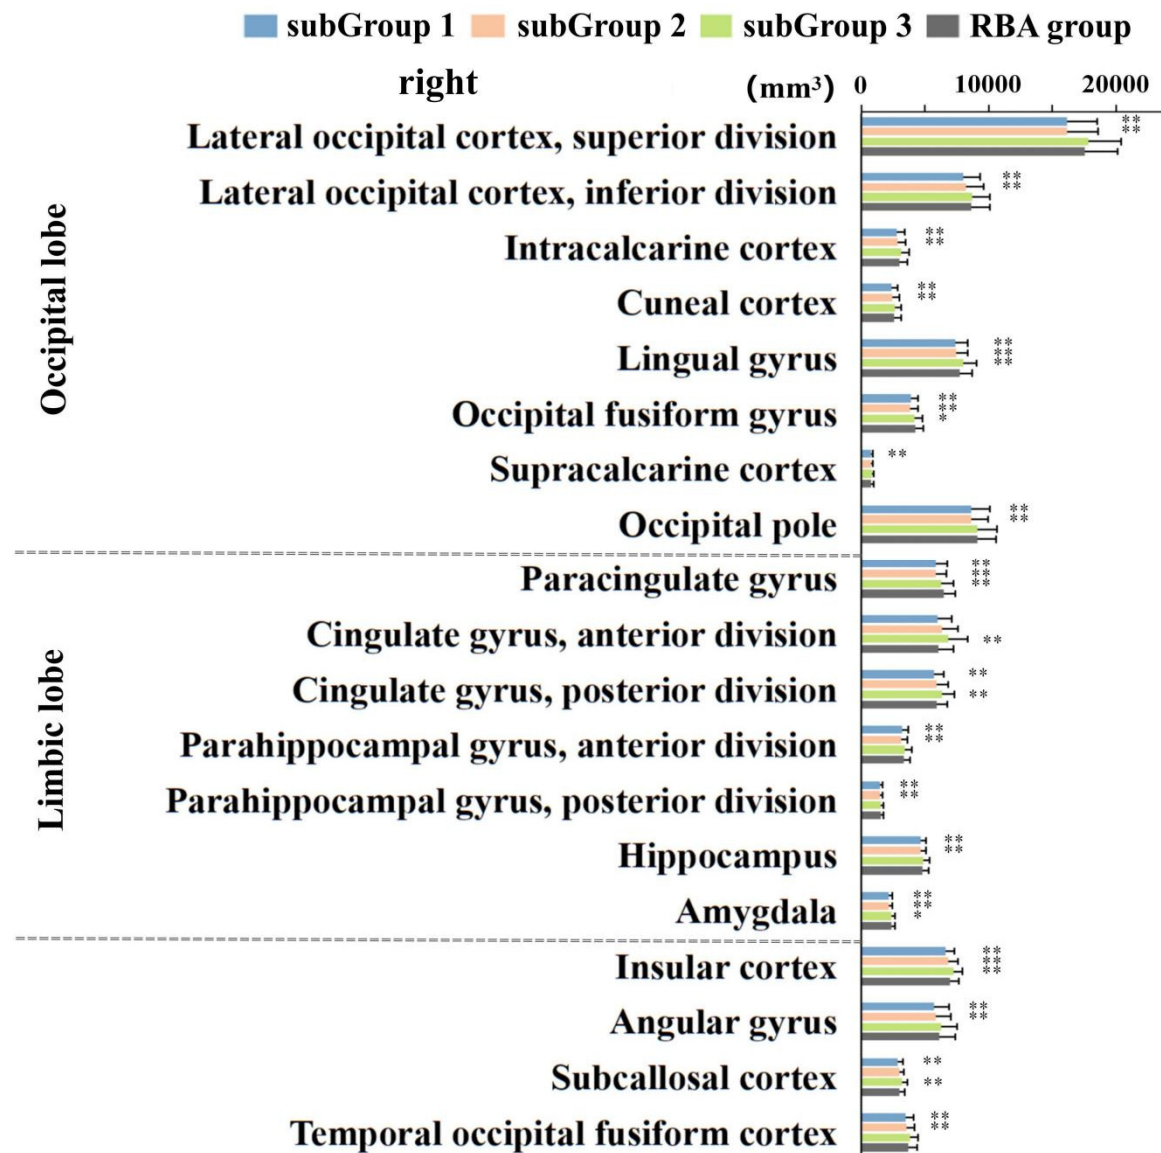

Supplement: s1 [file s1]
